# Supplementary material for: Extracellular vesicles from genetically unstable, oncogene-driven cancer cells trigger micronuclei formation in endothelial cells
Source: Sci Rep. 2020 May 22;10:8532. doi: 10.1038/s41598-020-65640-7 (PMC7244541; doi:10.1038/s41598-020-65640-7)
Supplement: Supplementary file 1 — Supplemental information. [file 41598_2020_65640_MOESM1_ESM.pdf]

**Extracellular vesicles from genetically unstable, oncogene-driven cancer cells trigger micronuclei formation in endothelial cells**

Shilpa Chennakrishnaiah<sup>a</sup>, Thupten Tsering<sup>a</sup>, Caroline Gregory<sup>a</sup>, Nadim Tawil<sup>a</sup>,  
Cristiana Spinelli<sup>a</sup>, Laura Montermini<sup>a</sup>, Nicolao Karatzas<sup>a</sup>, Saro Aprikian<sup>a</sup>,  
Dongsic Choi<sup>a</sup>, Ludger Klewes<sup>b</sup>, Sabine Mai<sup>b</sup>, Janusz Rak<sup>a</sup>

**Supplementary Figures**

Chromatin architecture in IEC-18 and RAS-3 cells

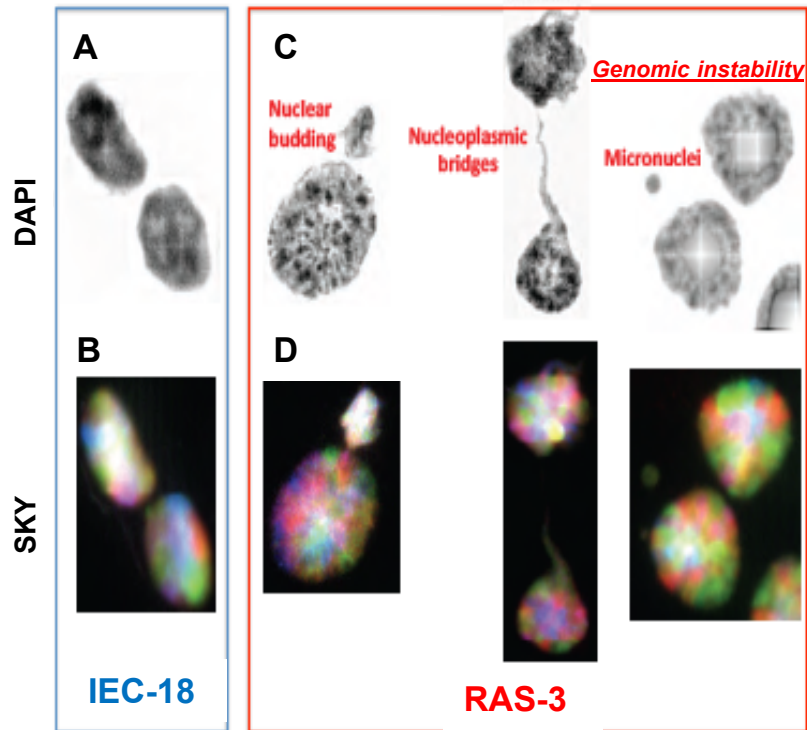

Figure S1. DAPI and SKY staining reveals alterations in the chromatin architecture of IEC-18 cells following transformation with mutant HRAS oncogene

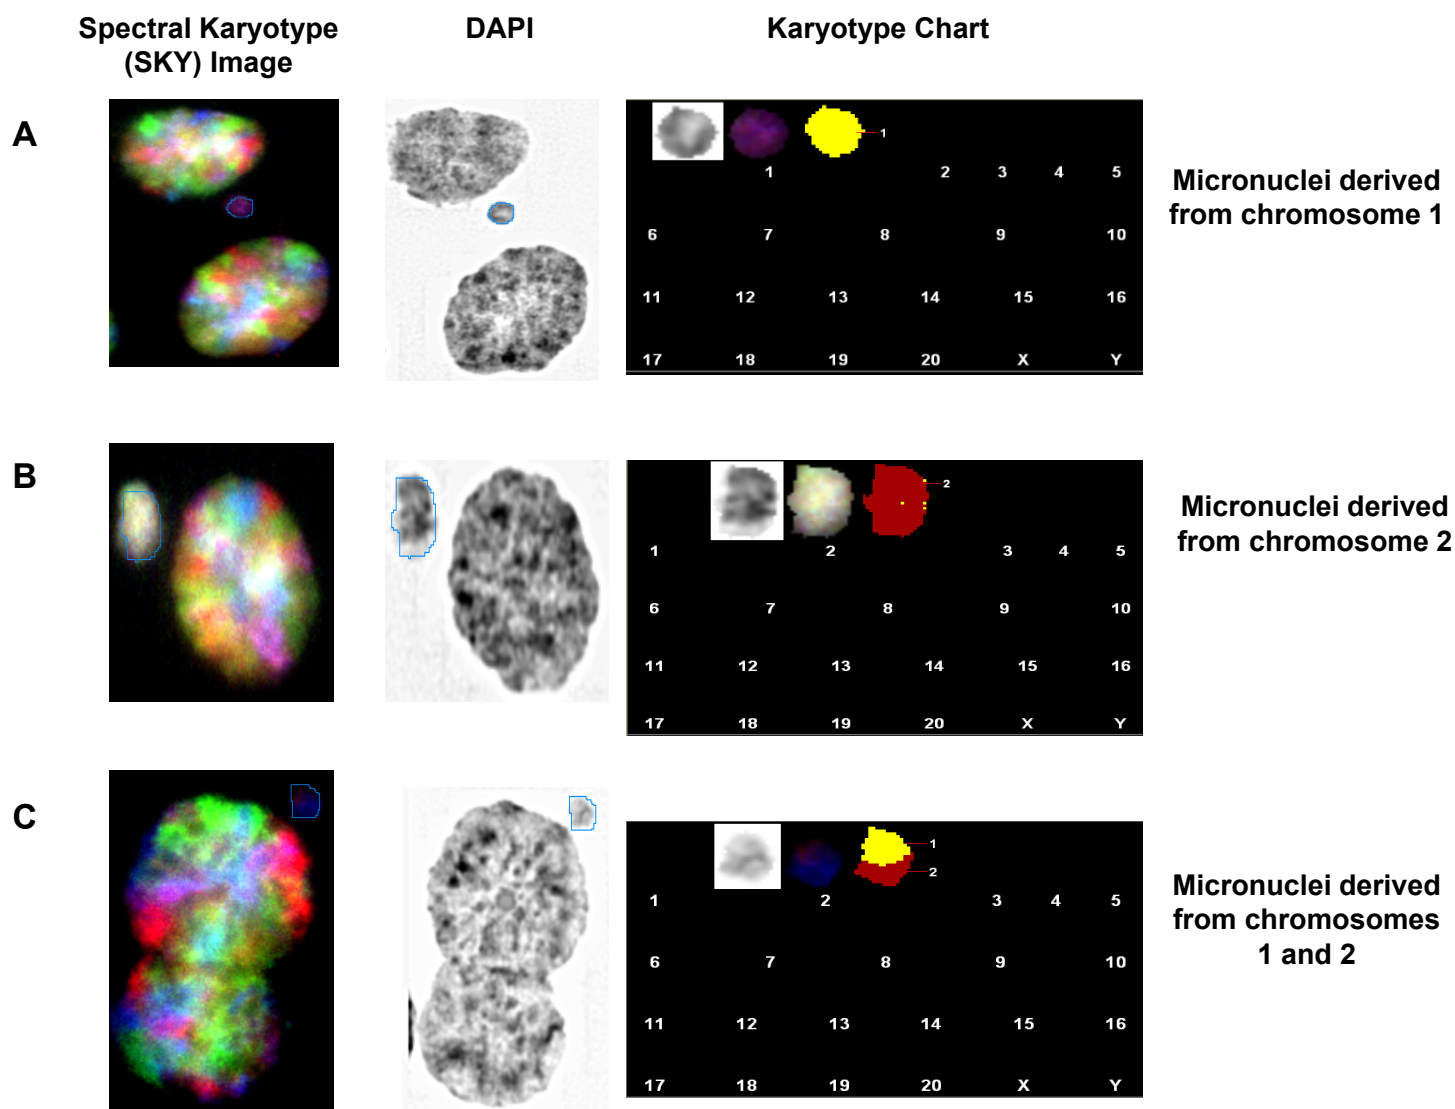

**Figure S2. Analysis of chromosomal content in micronuclei of RAS-3 cells**

**Micronuclei formation following transformation of IEC-18 cells with oncogenic *HRAS***

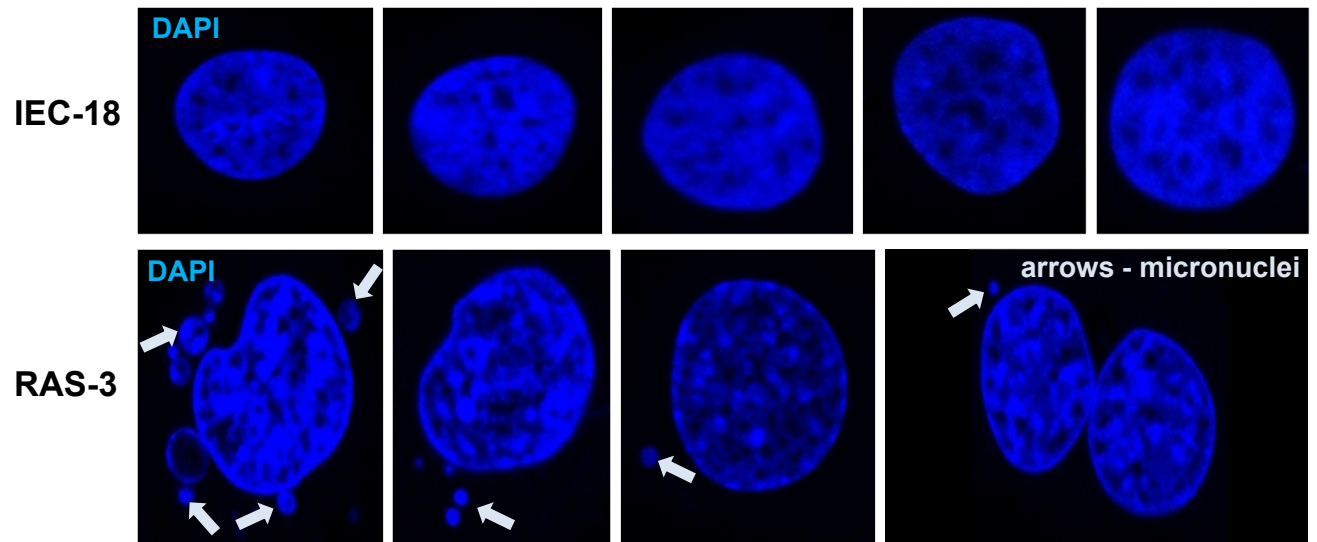

**Figure S3. DAPI staining reveals the impact of oncogenic *HRAS* on formation of micronuclei in cultured epithelial cells**

Chromosomes 1 and 2 in IEC-18 and RAS-3 cells

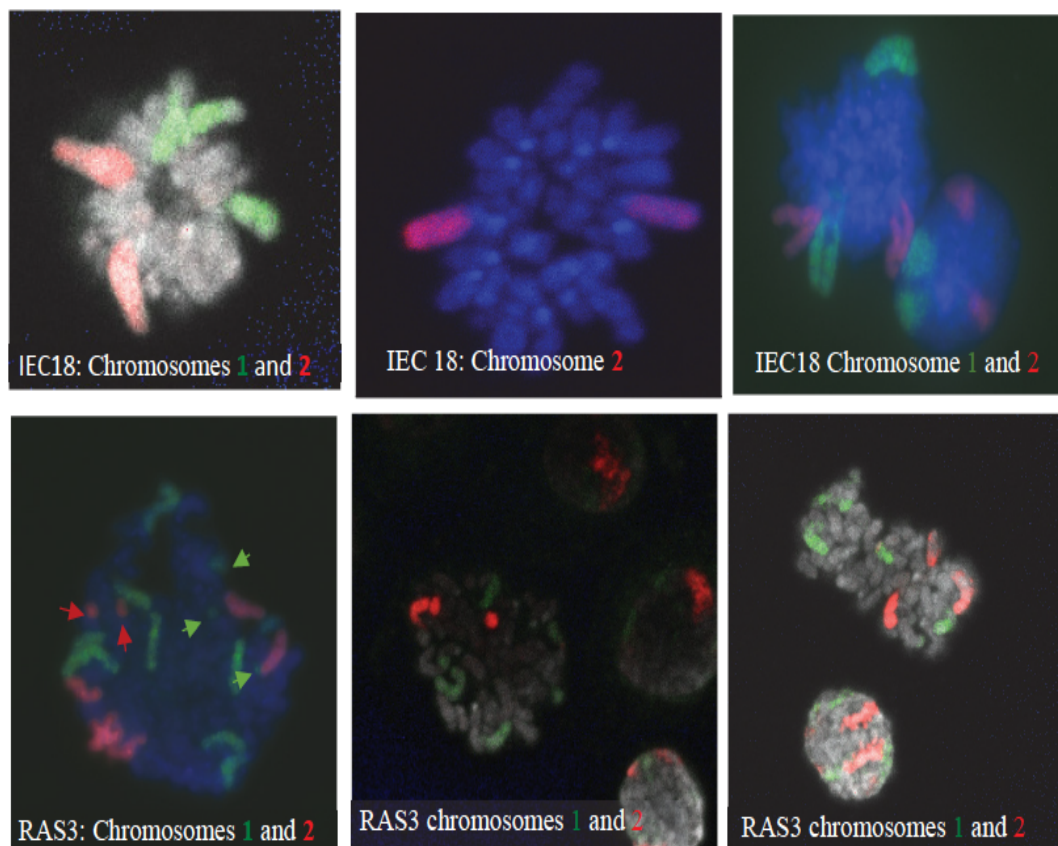

Figure S4. FISH staining reveals multiple chromosome 1 and 2 signals in nuclei of *HRAS*-transformed (RAS-3) cells

**A** Uptake of PKH26-labelled RAS-3 EVs by HUVEC (FACS)

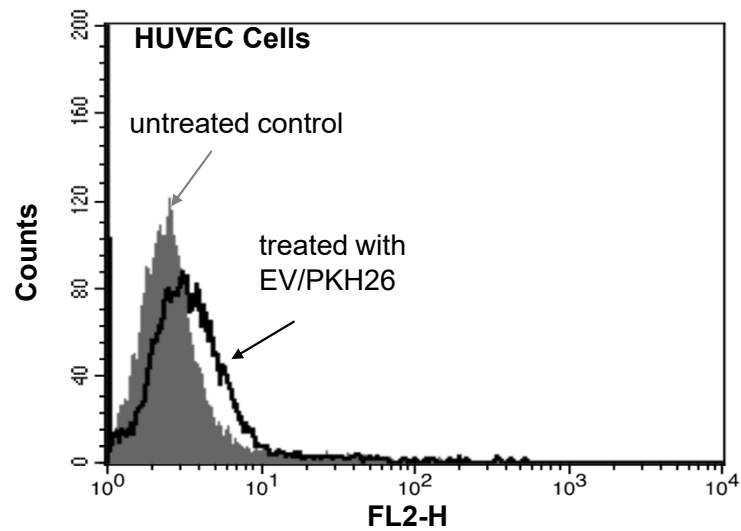

**B** Retention of exogenous gDNA (BACT) by HUVEC exposed to RAS-3-EVs (PCR)

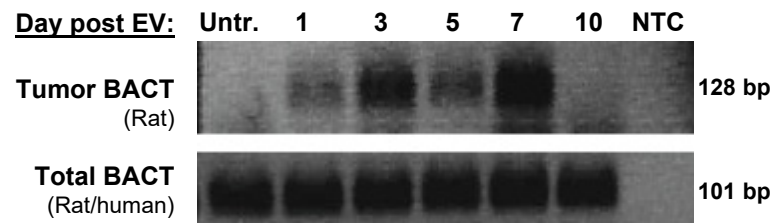

Figure S5. EV-mediated horizontal transfer of oncogenic *HRAS* DNA sequences from cancer cells to endothelial cells

Primary endothelial cells treated with EVs from glioma stem cells

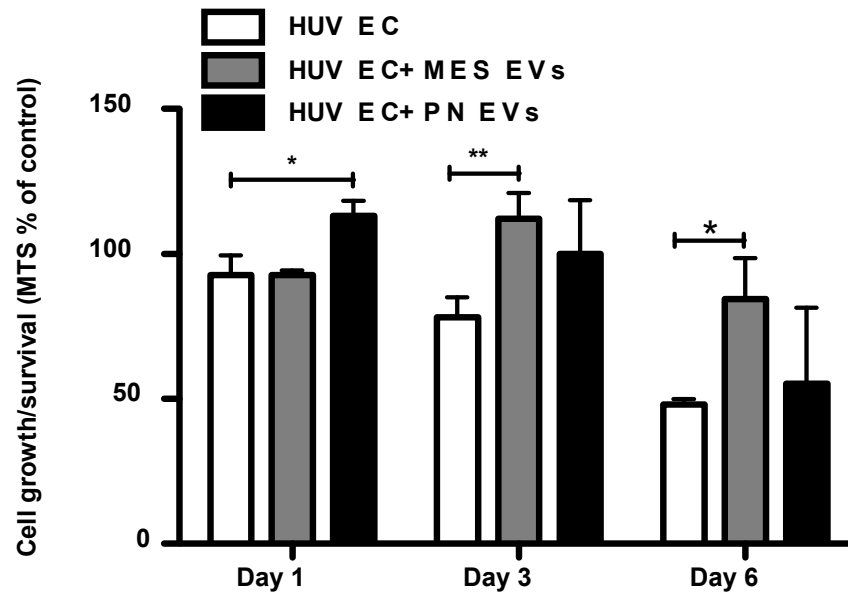

Figure S6. Stimulation of endothelial cell proliferation/survival by EVs from mesenchymal (MES) and proneural (PN) GSCs.

Primary endothelial cells treated with EVs from glioma stem cells

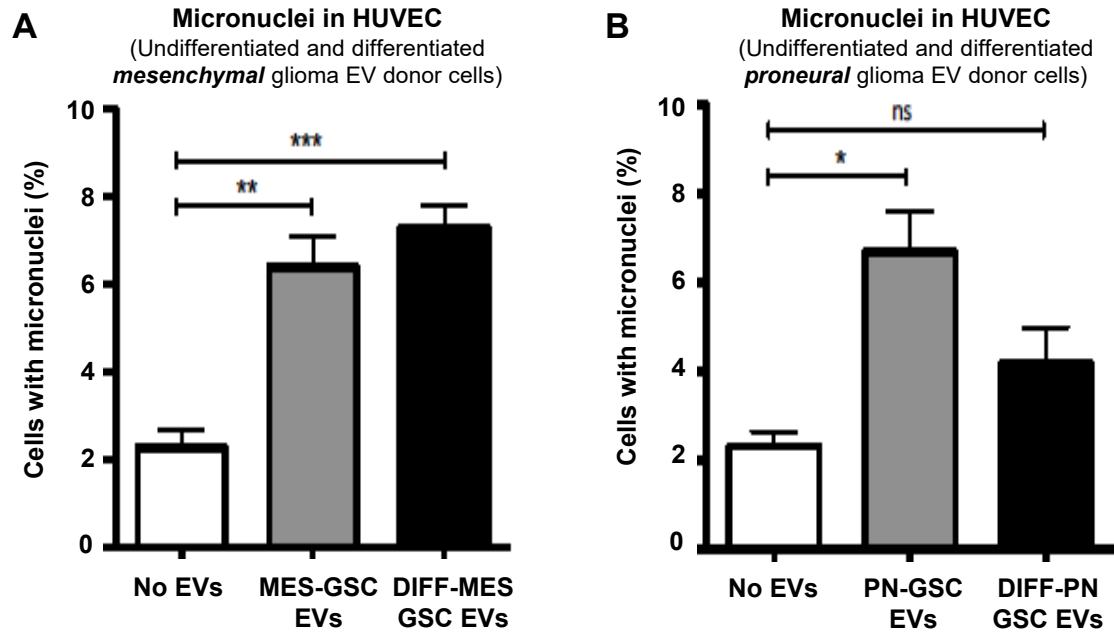

Figure S7. Differential effects of EVs from proneural and mesenchymal glioma stem cells (GSCs) and their differentiated counterparts (DIFF) on micronuclei formation by endothelial cells

**Immortalized endothelial cells treated with EVs from normal and cancer cells**

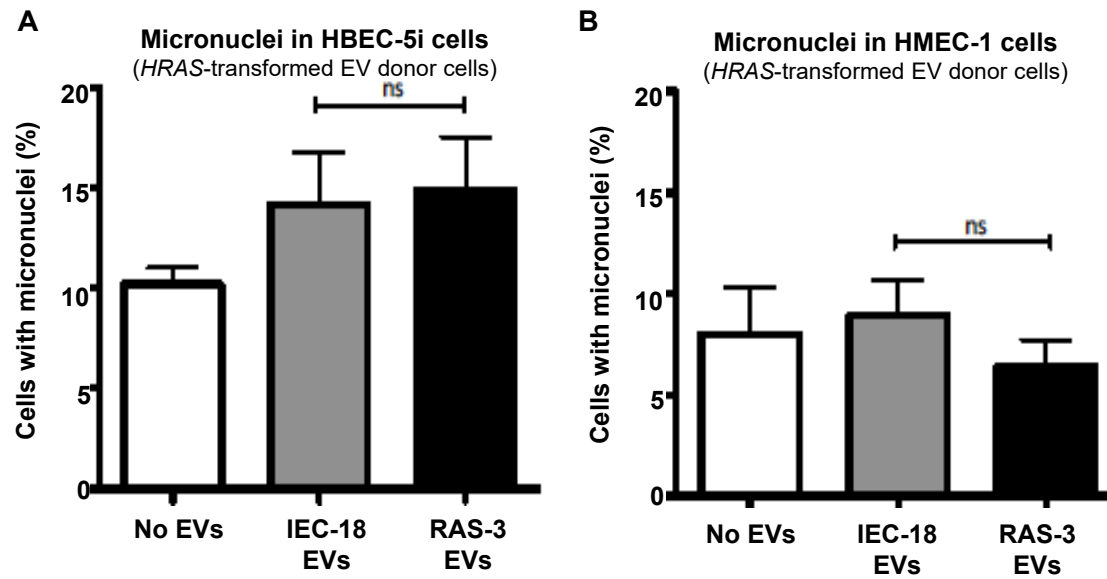

**Figure S8. The effects of cancer EVs on endothelial micronuclei formation is abrogated in immortalized endothelial cell lines**

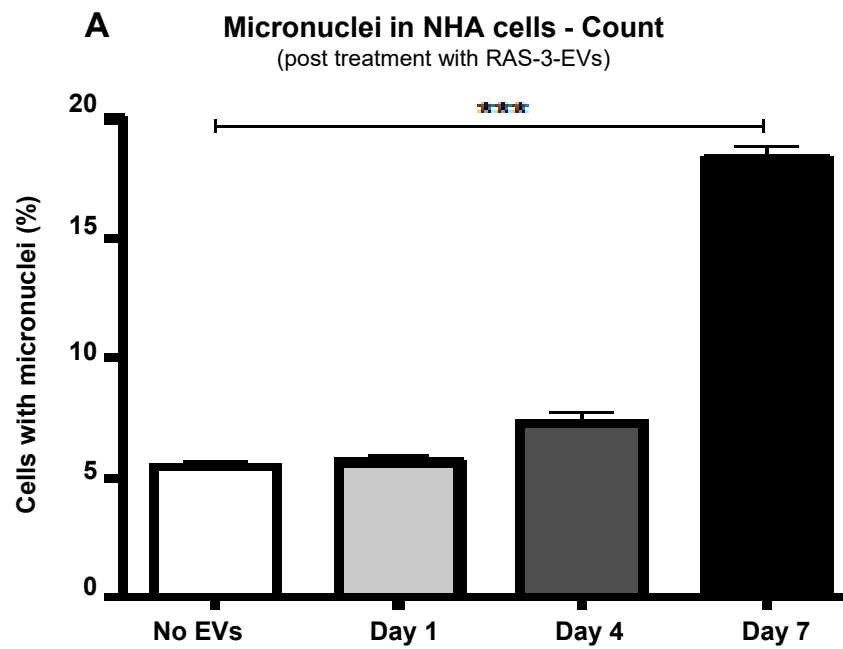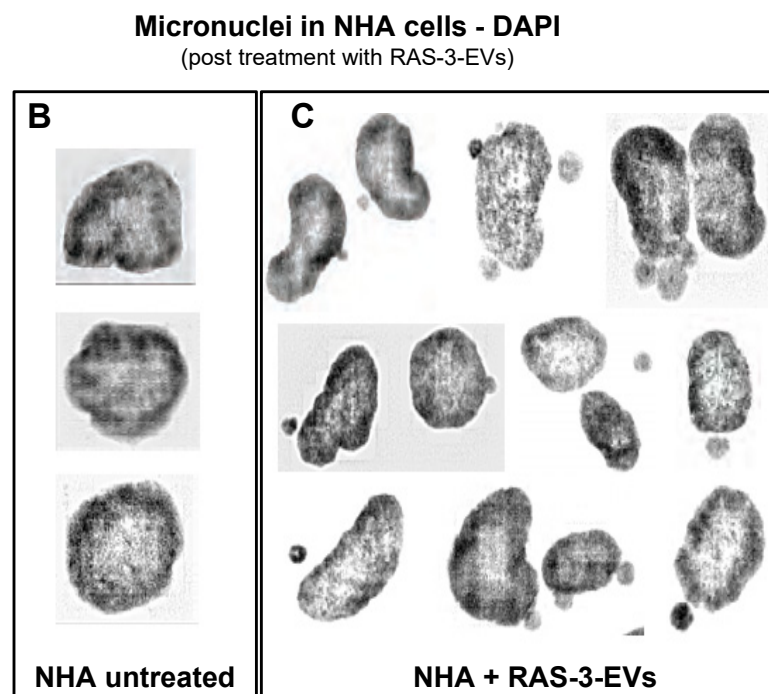

**Figure S9. Formation of micronuclei in astrocytes (NHA) treated with EVs from HRAS-transformed RAS-3 cancer cells**

**HTERT-immortalized human astrocytes (NHA) treated with EVs from cancer cells**

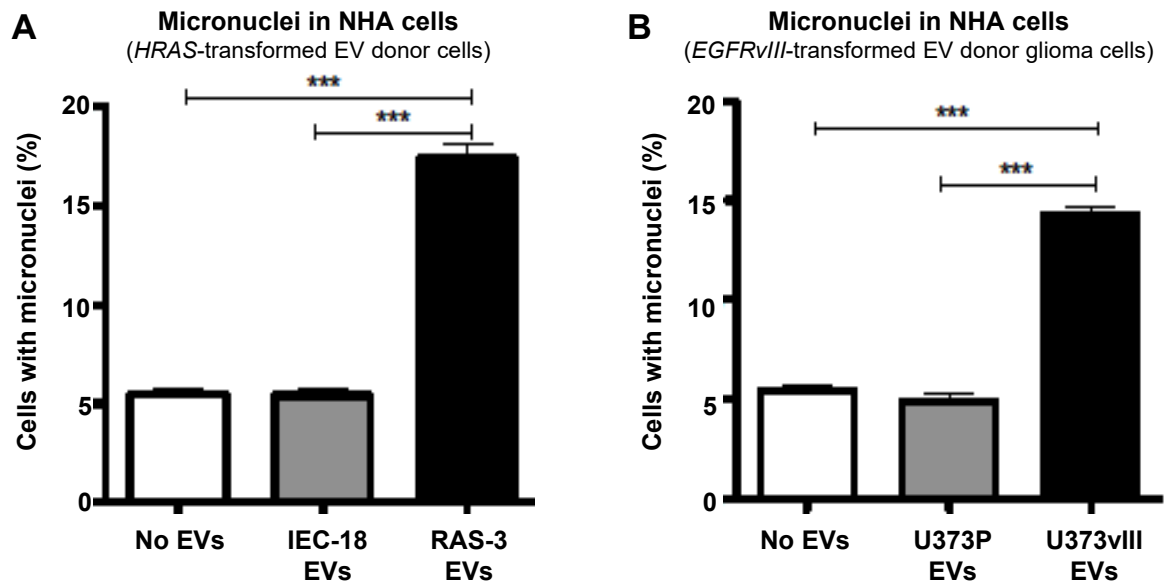

**Figure S10. EVs from cells transformed with HRAS or EGFRvIII oncogenes, but not from their indolent isogenic counterparts, trigger formation of micronuclei in immortalized human astrocytes**

**A** EV proteins shared between cancer cell lines capable of inducing endothelial micronuclei

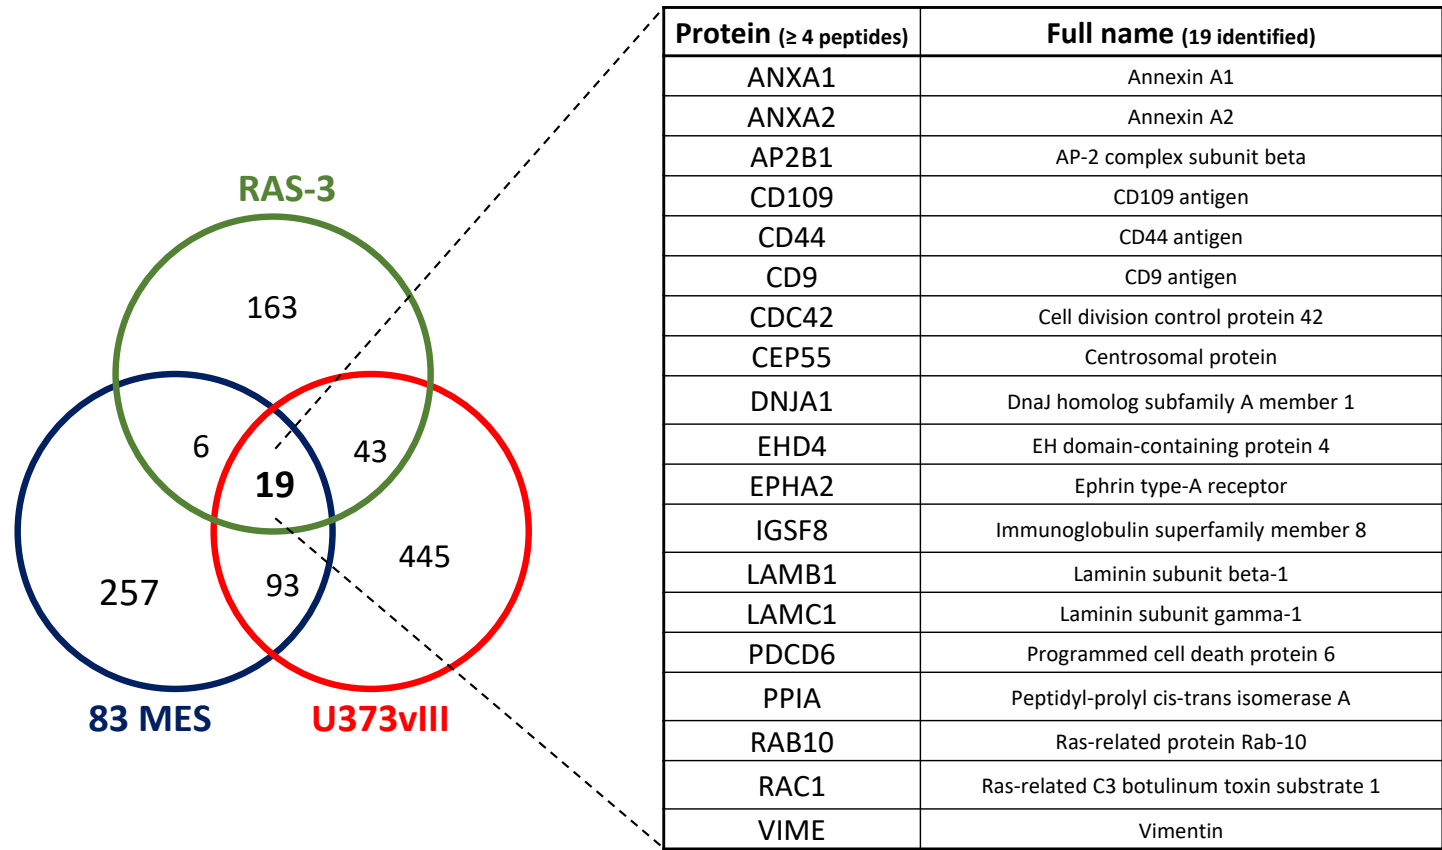

**B** EV proteins shared between cancer cell lines not capable of inducing endothelial micronuclei

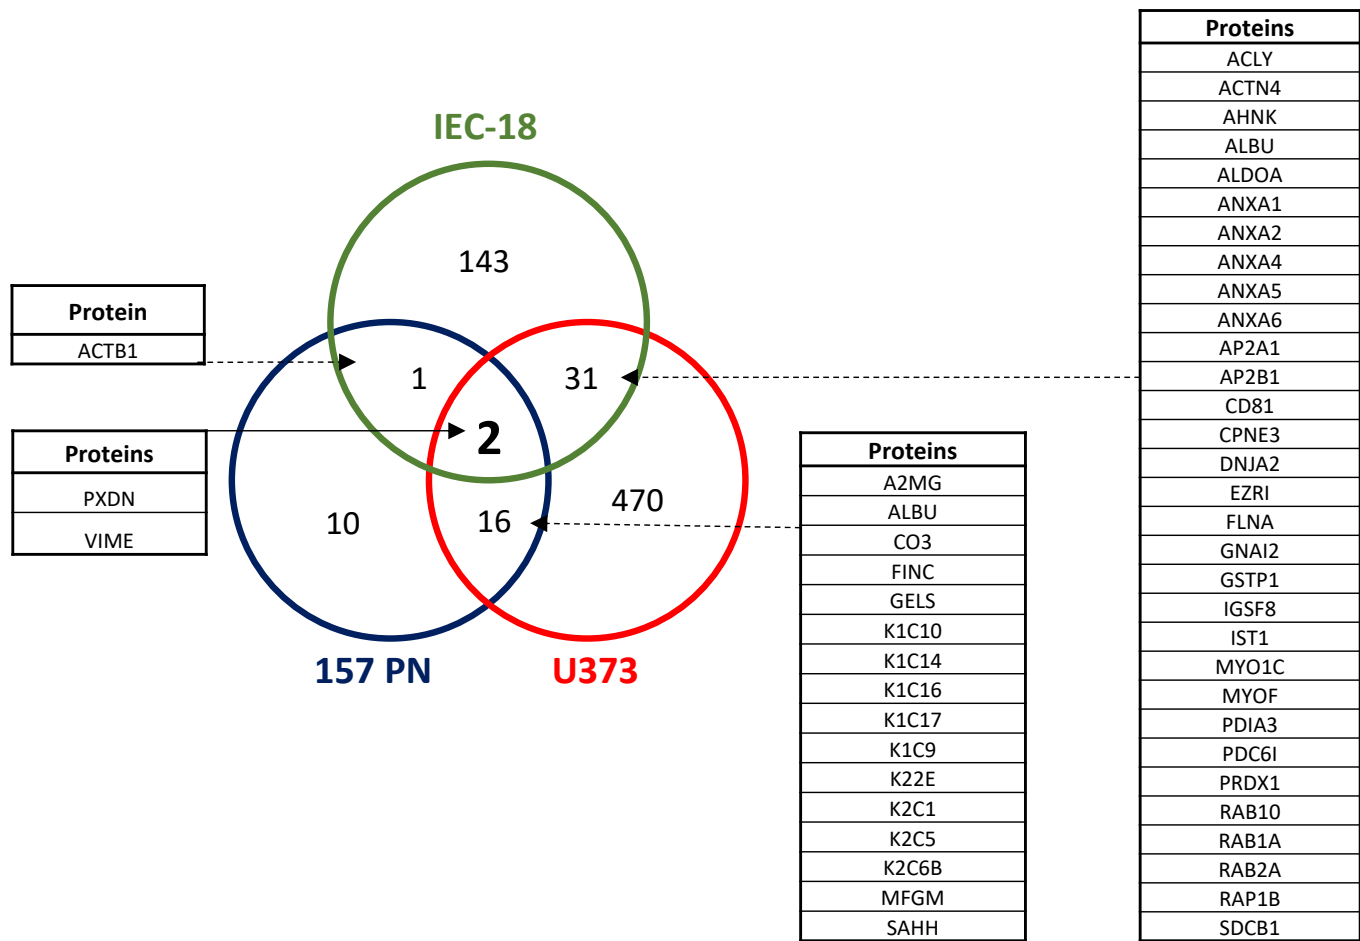

**Figure S11. Common EV-associated proteins released from cancer cells capable of paracrine induction of endothelial micronuclei**

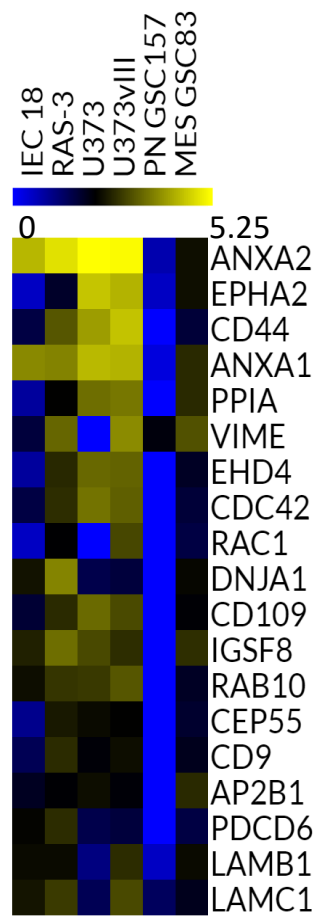

**Figure S12. Comparative EV content of proteins shared between cancer cells capable of inducing micronuclei formation in endothelial cells**
